# Supplementary material for: Heuristic process prediction model for screening optimal green entrainers based on TAC and LCA impacts utilizing PSE concepts
Source: Royal Society of Chemistry journal article supplement (doi:10.1039/d4gc00129j), 2024-01-01
Supplement: d4gc00129j1.pdf [file d4gc00129j1.pdf]

## A heuristic process prediction model for screening the optimal green entrainer with TAC and LCA impacts based on PSE concepts

### Electronic Supplementary Information

Qinggang Xu<sup>a</sup>, Yangyang Wang<sup>a</sup>, Kexin Yin<sup>a</sup>, Hongwei Xu<sup>a</sup>, Jianguang Qi<sup>a</sup>, Peizhe Cui<sup>a</sup>, Zhaoyou Zhu<sup>a</sup>, Yinglong Wang<sup>a,\*</sup>, Limei Zhong<sup>a</sup>, Yixin Ma<sup>b</sup>

<sup>a</sup> College of Chemical Engineering, Qingdao University of Science and Technology, Qingdao, 266042, P. R. China

<sup>b</sup> College of Chemical and Environmental Engineering, Shandong University of Science and Technology, Qingdao, 266590, P. R. China

**\*Corresponding Author:** Yinglong Wang

\*E-mail: wangyinglong@qust.edu.cn

College of Chemical Engineering, Qingdao University of Science and Technology  
266042, Qingdao, China

**Table S1:** The optimization operation parameters and objective function of TAC evaluation following the Luyben model<sup>49</sup>.

| Parameters                | Unit                                            | Content |
|---------------------------|-------------------------------------------------|---------|
| condensers                |                                                 |         |
| heat transfer coefficient | $\text{kW}\cdot\text{m}^{-2}\cdot\text{K}^{-1}$ | 0.852   |

capital cost  $7296 \times (A_C)^{0.65}$

heat transfer area: A  $m^2$   $A_C = \frac{Q_C}{K_C \Delta T_C}$

reboilers

heat transfer coefficient  $kW \cdot m^{-2} \cdot K^{-1}$  0.568

capital cost  $7296 \times (A_R)^{0.65}$

heat transfer area: A  $m^2$   $A_R = \frac{Q_R}{K_R \Delta T_C}$

Q is the duty of the heat exchanger (kW),  $\Delta t$  is the temperature difference (K), and K is the heat transfer coefficient

column vessel

capital cost  $17640 \times D^{1.066} \times H^{0.802}$

length: H  $m$   $H = 1.2 \times 0.61 \times (NT-2)$

diameter: D  $m$  Calculated by Aspen tray sizing

---

**Table S2:** Comply with the optimization operation parameters of the Douglas model and the objective function of TAC evaluation<sup>50</sup>.

| Project           | Content                                                                                                                              | Unit                                                |
|-------------------|--------------------------------------------------------------------------------------------------------------------------------------|-----------------------------------------------------|
| ID                | Aspen tray sizing                                                                                                                    | m                                                   |
| H                 | $0.61 \times (NT/0.75-3) + 6$                                                                                                        | m                                                   |
| Column shell cost | $C_1 = \left(\frac{M\&S}{280}\right) \times 937.636 \times D^{1.066} \times H^{0.802} \times (2.18 + F_C)$                           | \$                                                  |
|                   | $F_C = F_m \cdot F_p$ , $F_m = 3.67$ , $F_p = 1.05$ , $P \leq 6.8 \text{ atm}$ ; $F_p = 1.00$ , $P \leq 3.4 \text{ atm}$             |                                                     |
| $A_C$             | $A_C = \frac{Q_C}{K_C \Delta T_C}$                                                                                                   | $\text{m}^2$                                        |
| $K_C$             | 0.852                                                                                                                                | $\text{kW} \cdot \text{m}^{-2} \cdot \text{K}^{-1}$ |
| EH cost           | $C_2 = \left(\frac{M\&S}{280}\right) \times 474.668 \times A^{0.65} \times (2.29 + F_C)$                                             | \$                                                  |
|                   | $F_C = (F_d + F_p) \cdot F_m$ , $F_m = 3.75$ , $F_d = 1.35$ (kettle reboiler), $F_d =$ (fixed tube sheet heat exchangers), $F_p = 0$ |                                                     |
| $A_R$             | $A_R = \frac{Q_R}{K_R \Delta T_C}$                                                                                                   | $\text{m}^2$                                        |
| $K_R$             | 0.568                                                                                                                                | $\text{kW} \cdot \text{m}^{-2} \cdot \text{K}^{-1}$ |
| Energy costs      |                                                                                                                                      |                                                     |
| LP steam /433 K   | 7.78                                                                                                                                 | $\text{\$} \cdot \text{GJ}^{-1}$                    |
| MP steam /457 K   | 8.22                                                                                                                                 | $\text{\$} \cdot \text{GJ}^{-1}$                    |
| HP steam /537 K   | 9.88                                                                                                                                 | $\text{\$} \cdot \text{GJ}^{-1}$                    |
| M&S               | 1431.7                                                                                                                               |                                                     |
| Membrane Cost     | $327.62 \times A_M$                                                                                                                  | \$                                                  |
| Vacuum Pump Cost  | $C_3 = 4200 \times \left(\frac{60 \times F_p \times 8.314 \times 273.15}{3600 \times 101.325}\right)^{0.55}$                         | \$                                                  |
| $F_p$             | Aspen simulation results                                                                                                             | $\text{kmol} \cdot \text{h}^{-1}$                   |
| TAC               | $TAC = \frac{\text{capital cost}}{\text{payback period}} + \text{energy cost}$                                                       | $\text{\$} \cdot \text{y}^{-1}$                     |
| Payback period    | 3                                                                                                                                    | years                                               |
| Operation time    | 8000                                                                                                                                 | $\text{h} \cdot \text{year}^{-1}$                   |

**Table S3:** The thermodynamic data of Methanol+Toluene azeotropes<sup>44</sup>.

| Azeotrope         | Methanol-toluene                   |                |
|-------------------|------------------------------------|----------------|
|                   | $x_{\text{methanol}} / \text{mol}$ | Temperature /K |
| Experimental data | 0.8820-0.8860                      | 336.41-336.95  |
| NRTL model        | 0.887                              | 337.02         |
| UNIQUAC model     | 0.8843                             | 336.91         |

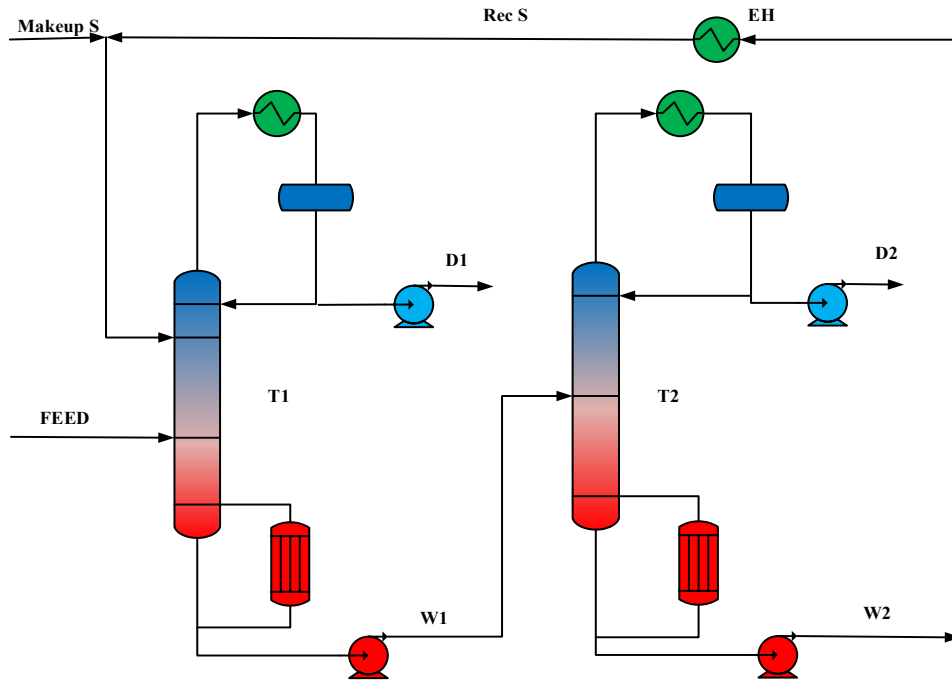

**Fig. S1** The flowsheet of separating azeotropes by ED with different entrainer

**Table S4:** The relationship between  $V_i$ ,  $R_{i,min}$ ,  $R_i$ ,  $N_{i,min}$ , and  $N_i$  to  $\alpha_i$ <sup>44</sup>.

| Parameters                 | Content                                                                                                                                                                | Unit                            |
|----------------------------|------------------------------------------------------------------------------------------------------------------------------------------------------------------------|---------------------------------|
| Total steam load ( $V_i$ ) | $V_i = D_i + L_i = D_i \times (R_i + 1) = \frac{C_1}{ \alpha_i - 1 }$                                                                                                  | $\text{kg} \cdot \text{h}^{-1}$ |
| $R_{i,min}$                | $R_{i,min} = \frac{1}{ \alpha_i - 1 } \times \frac{x_{D,LK}}{x_{F,LK}} - \alpha_i \times \frac{x_{D,HK}}{x_{F,HK}} = C_2 \times \frac{1}{ \alpha_i - 1 }$              |                                 |
| $R_i$                      | $R_i = (1.2 \sim 2) \times R_{i,min}$                                                                                                                                  |                                 |
| $N_{i,min}$                | $N_{i,min} = \frac{\log_{10} \left( \frac{x_{D,LK}}{x_{D,HK}} \times \frac{x_{W,HK}}{x_{W,LK}} \right)}{\log_{10} \alpha_i} = C_4 \times \frac{1}{\log_{10} \alpha_i}$ |                                 |
| $N_i$                      | $N_i = (1.2 \sim 2) \times N_{i,min} = C_5 \times \frac{C_4}{\log_{10} \alpha_i}$                                                                                      |                                 |

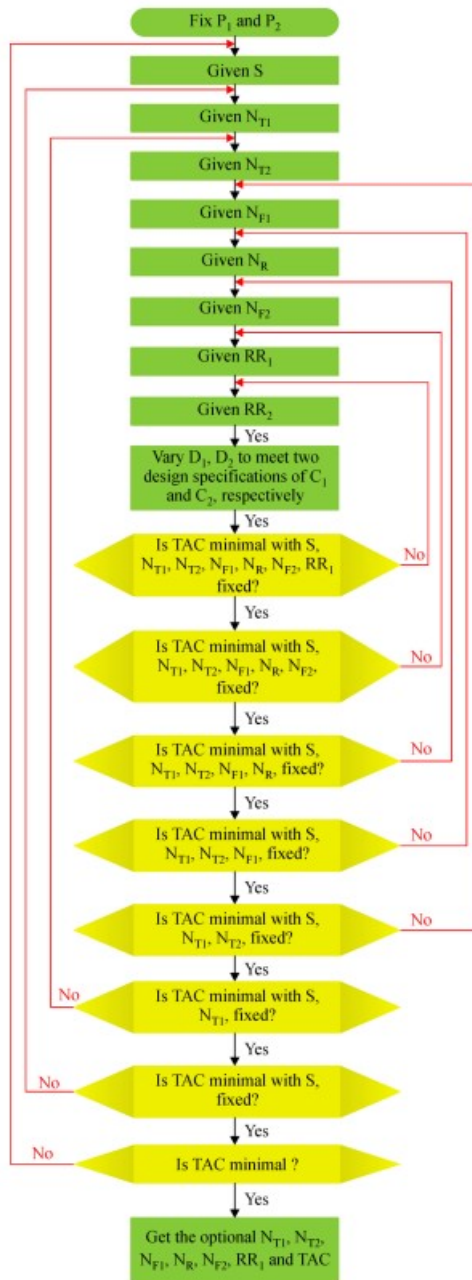

Fig. S2 The simulated and optimized procedure of the ED processes<sup>44</sup>.

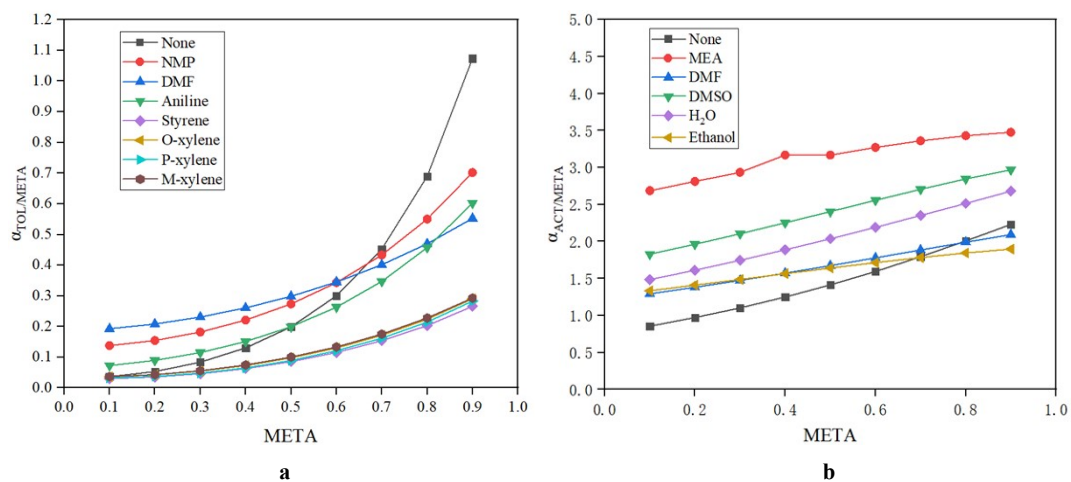

**Fig. S3** The changed curves of a:  $\alpha_{TOL-META}$  and b:  $\alpha_{ACT-META}$  after non or adding entrainers<sup>45</sup>.

**Table S5:** The detailed life cycle inventory of each entrainer for separating TOL+META azeotropes with the ED processes.

| Project | Unit                                   | NMP           | Aniline       | DMF           | Styrene       | o-xylene      | p-xylene      | m-xylene      |
|---------|----------------------------------------|---------------|---------------|---------------|---------------|---------------|---------------|---------------|
| GWP     | kg·y <sup>-1</sup> CO <sub>2</sub> Eq. | 289.703       | 281           | 285.973       | 335.708       | 345.655       | 407.781       | 494.128       |
| AP      | kg·y <sup>-1</sup> SO <sub>2</sub> Eq. | 0.5176        | 0.5021        | 0.511         | 0.5998        | 0.6176        | 0.7287        | 0.8775        |
| HTP     | kg DCB Eq.                             | 8.9837        | 8.7138        | 8.8681        | 10.4103       | 10.7188       | 12.6447       | 15.2299       |
| FETP    | kg DCB Eq.                             | 0.1545        | 0.1499        | 0.1525        | 0.1791        | 0.1844        | 0.2175        | 0.262         |
| TETP    | kg DCB Eq.                             | 0.1611        | 0.1563        | 0.159         | 0.1867        | 0.1922        | 0.2268        | 0.2731        |
| TEDI    |                                        | <b>0.56</b>   | <b>0.58</b>   | <b>0.79</b>   | <b>1.62</b>   | <b>1.74</b>   | <b>2.75</b>   | <b>2.81</b>   |
| LTEDI   |                                        | <b>0.3815</b> | <b>0.4156</b> | <b>0.5319</b> | <b>0.7431</b> | <b>0.7772</b> | <b>0.9981</b> | <b>1.0178</b> |

**Table S6:** The detailed life cycle inventory of each entrainer for separating ACT+META azeotropes with the ED processes.

| Project | Unit                                   | MEA           | DMSO          | Water         | DMF           | Ethanol       |
|---------|----------------------------------------|---------------|---------------|---------------|---------------|---------------|
| GWP     | kg·y <sup>-1</sup> CO <sub>2</sub> Eq. | 273.415       | 353.737       | 516.617       | 487.398       | 1883.69       |
| AP      | kg·y <sup>-1</sup> SO <sub>2</sub> Eq. | 0.488513      | 0.632023      | 0.923043      | 0.870837      | 3.36561       |
| HTP     | kg DCB Eq.                             | 8.4786        | 10.9694       | 16.0203       | 15.1142       | 58.4134       |
| FETP    | kg DCB Eq.                             | 0.1458        | 0.1887        | 0.2756        | 0.26          | 1.0048        |
| TETP    | kg DCB Eq.                             | 0.152         | 0.1967        | 0.2873        | 0.271         | 1.0495        |
| TEDI    |                                        | <b>1.06</b>   | <b>2.21</b>   | <b>4.5</b>    | <b>7.32</b>   | <b>12.77</b>  |
| LTEDI   |                                        | <b>0.5209</b> | <b>0.7985</b> | <b>1.4536</b> | <b>1.6221</b> | <b>2.8898</b> |

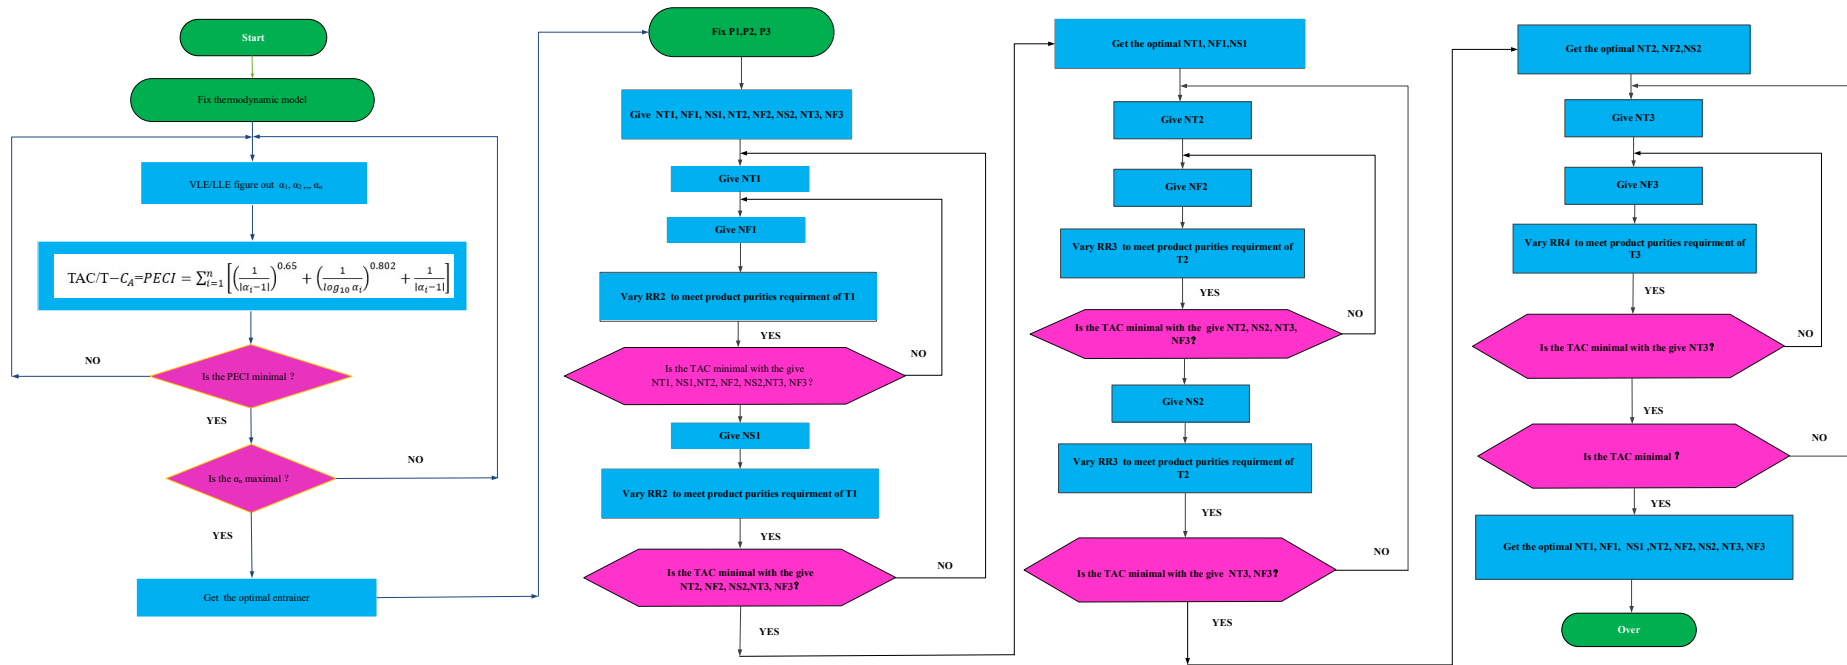

**Fig. S4** The simulated and optimized procedure of combining with the heuristics process prediction model, Luyben model, and Douglas model.



**Table S7.** RMSD of thermodynamic models for DIPE/IPA/EG system.

| Model   | T/K   | RMSD  |
|---------|-------|-------|
| NRTL    | 303.2 | 0.96% |
|         | 323.2 | 1.00% |
| UNIQUAC | 303.2 | 0.88% |
|         | 323.2 | 0.93% |

**Table S8.** The binary interaction parameters of EG experimental data and the UNIFIAC model.

| Project  | Experimental data | UNIFIAC model |
|----------|-------------------|---------------|
| $A_{ij}$ | -32.6817072       | 0             |
| $A_{ji}$ | 8.07455844        | 0             |
| $B_{ij}$ | 9753.87956        | -605.303      |
| $B_{ji}$ | -2648.31753       | -96.11        |

**Table S9.** The binary interaction parameters of components on the UNIQUAC model.

| Component $i$    | Component $j$    | $A_{ij}$    | $A_{ji}$   | $B_{ij}$    | $B_{ji}$    |
|------------------|------------------|-------------|------------|-------------|-------------|
| DIPE             | IPA              | 0           | 0          | -353.6478   | 129.0989    |
| IPA              | EG               | 4.4078      | -4.9486    | -1828.0739  | 1906.1646   |
| DIPE             | EG               | -32.6817072 | 8.07455844 | 9753.87956  | -2648.31753 |
| DIPE             | H <sub>2</sub> O | 0           | 0          | -774.7116   | -29.592     |
| IPA              | H <sub>2</sub> O | 2.9234      | -3.3127    | -1111.674   | 1045.5786   |
| EG               | H <sub>2</sub> O | 0.6018      | -0.6018    | -18.6714    | 120.7787    |
| DIPE             | PDO              | 0           | 0          | -632.111535 | 67.2706956  |
| IPA              | PDO              | -0.888692   | 1.46548    | 525.204     | -925.082    |
| H <sub>2</sub> O | PDO              | -0.624216   | 0.317496   | -295.272    | 228.528     |

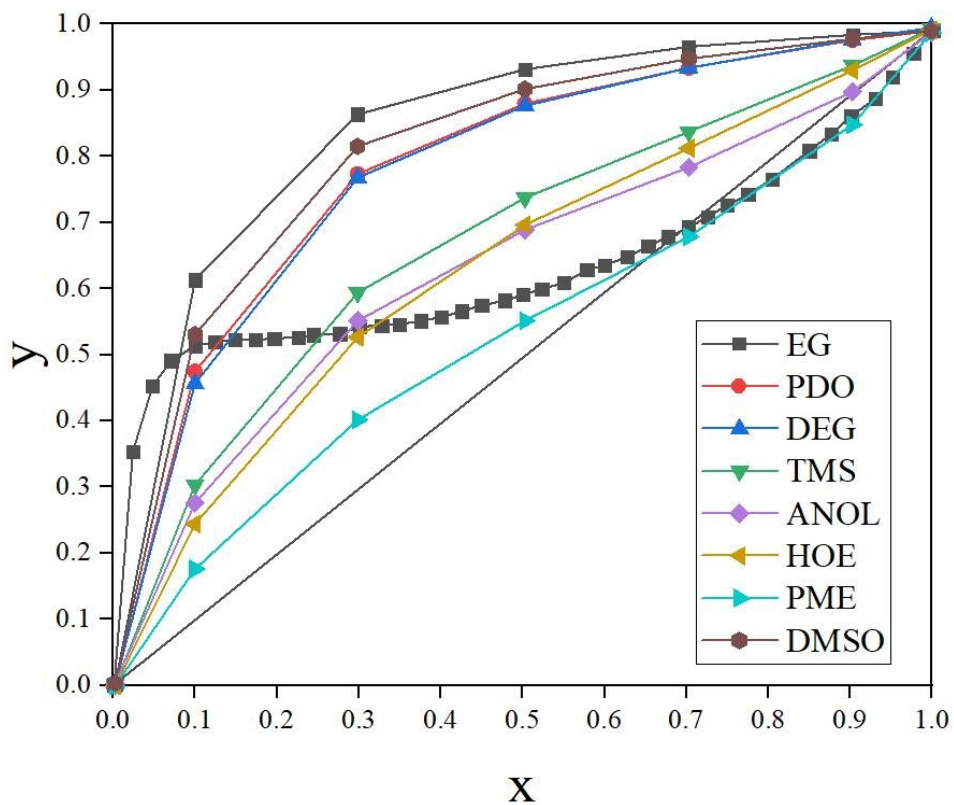

a

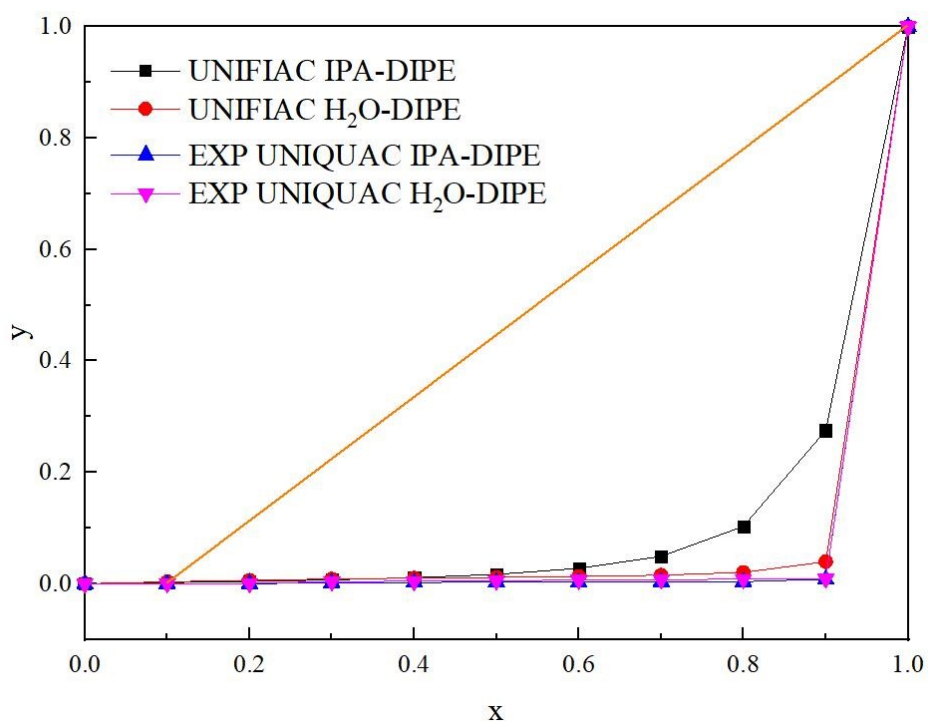

b

**Fig. S5.** The  $y$ - $x$  diagram of relative volatility changes with extractant molar ratio is 0.5.  
*(a: The  $y$ - $x$  diagram of  $\alpha_{DIPE-IPA}$ ; b: the  $\alpha_{IPA-DIPE}$  changes show the UNIQUAC model is superior to the UNIFAC model; EXP means experiment.)*

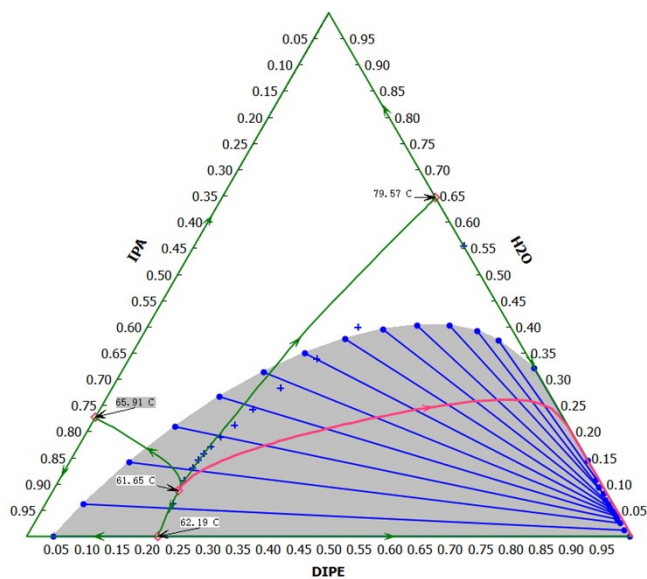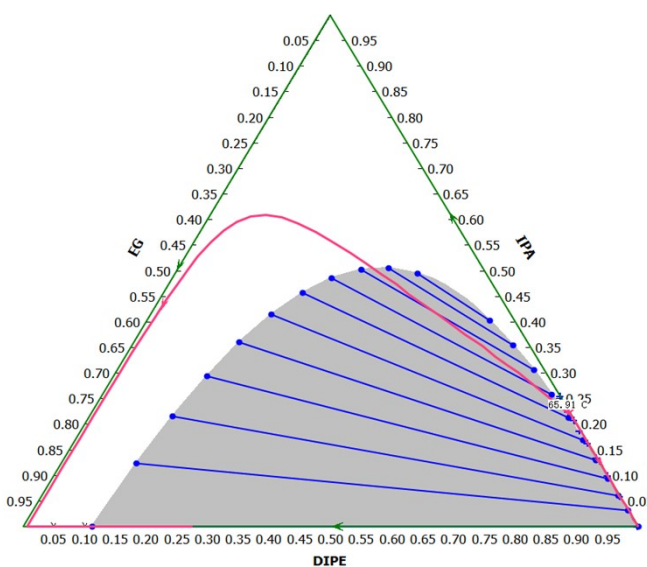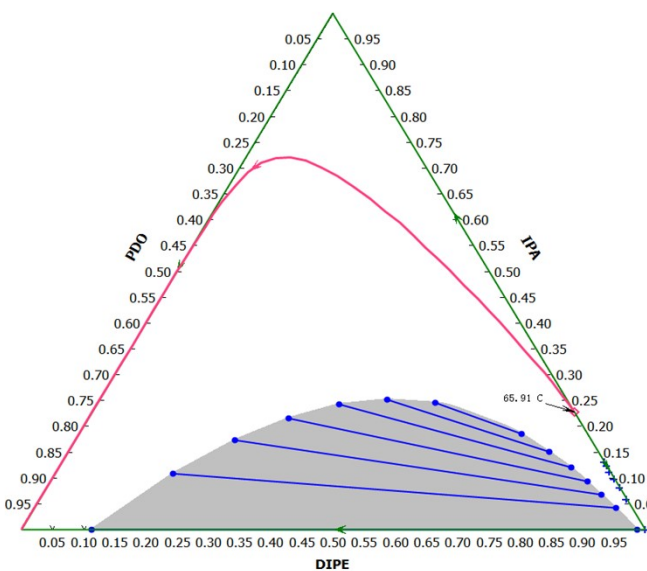

Fig. S6. The ternary phase diagram of DIPE/IPA/H<sub>2</sub>O, DIPE/IPA/EG and DIPE/IPA/PDO.

**Table S10.** The calculation results are based on the model index for separating DIPE/IPA/H<sub>2</sub>O (30 wt%: 10 wt%: 60 wt%) ternary azeotropes.

| Project                  | Unit | DMSO          | EG           |
|--------------------------|------|---------------|--------------|
| T <sub>BP</sub>          | °C   | 189           | 197.3        |
| $\alpha_{DIPE-IPA+H_2O}$ |      | 22.354        | 108.240      |
| $\alpha_{IPA-H_2O}$      |      | <b>10.722</b> | <b>8.558</b> |
| $\alpha_{H_2O-SOL}$      |      | 40.884        | 43.548       |
| PECI1                    |      | 0.970         | 0.623        |
| PECI2                    |      | 1.307         | 1.459        |
| PECI3                    |      | 0.798         | 0.784        |
| PECI                     |      | 3.075         | 2.866        |
| LTEDI                    |      | 0.175         | 0.165        |

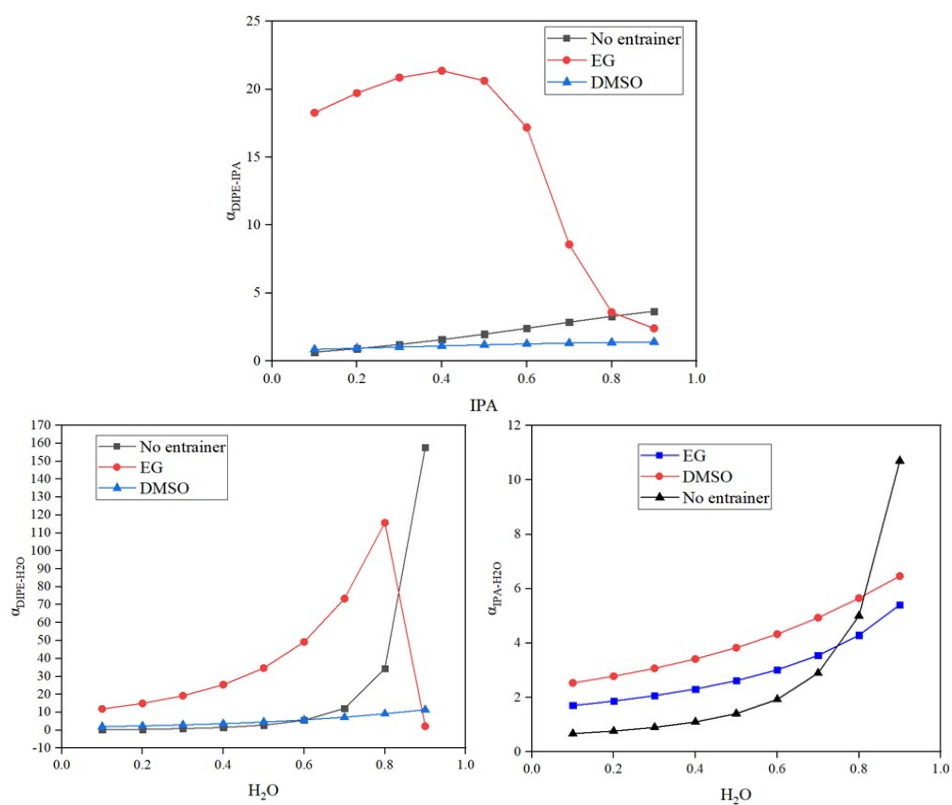

**Fig. S7.** The changes of relative volatility for DIPE/IPA/H<sub>2</sub>O azeotropes with EG, DMSO, and no entrainer.
